# Supplementary material for: Highly crystalline Ti-doped SnO2 hollow structured photocatalyst with enhanced photocatalytic activity for degradation of organic dyes
Source: Royal Society of Chemistry journal article supplement (doi:10.1039/c5ce00184f), 2015-01-01
Supplement: c5ce00184f1.pdf [file c5ce00184f1.pdf]

*Supporting Information for*

**Highly Crystalline Ti-doped SnO<sub>2</sub> Hollow Structured Photocatalyst with Enhanced Photocatalytic Activity for Degradation of Organic Dyes**

Lei Ran, Longwei Yin\*

*Key Laboratory for Liquid-Solid Structural Evolution and Processing of Materials, Ministry of Education, School of Materials Science and Engineering, Shandong University, Jinan 250061, P. R. China*

\*To whom correspondence should be addressed. Tel.: + 86 531 88396970. Fax: + 86 531 88396970. E-mail: [yinlw@sdu.edu.cn](mailto:yinlw@sdu.edu.cn)

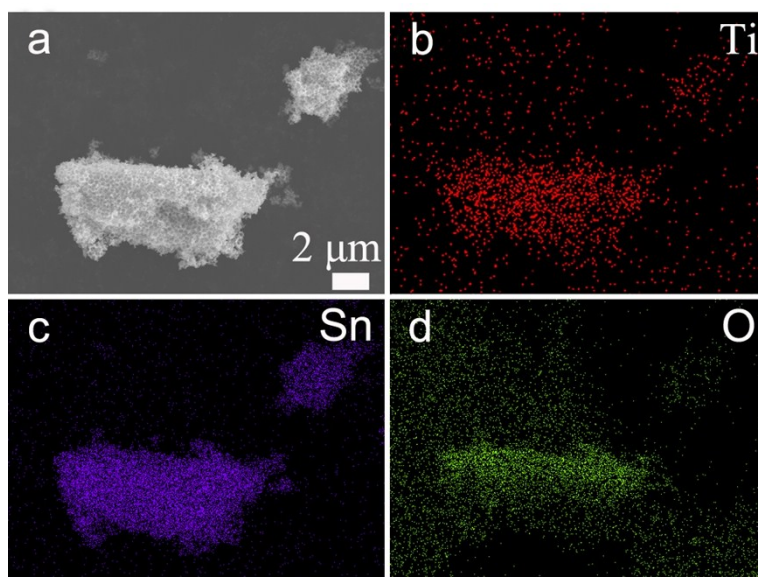

**Fig. S1** (a) SEM image of 20%Ti-doped SnO<sub>2</sub>. (b) (c) (d) Ti, Sn, O elemental mapping images of 20%Ti-doped SnO<sub>2</sub>.

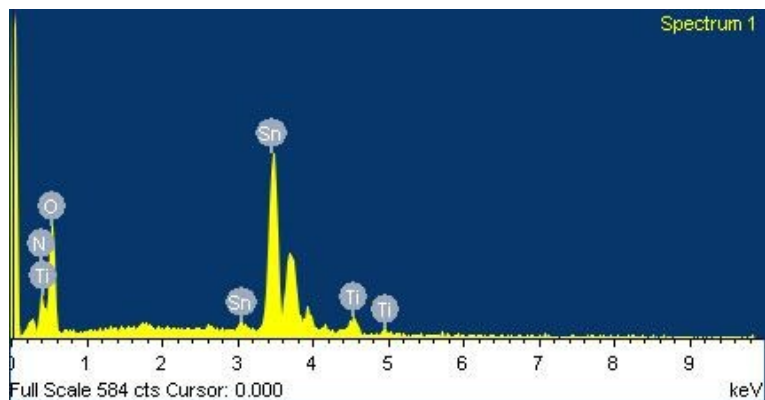

**Fig. S2** A typical EDS spectrum for the 20%Ti-doped SnO<sub>2</sub>.

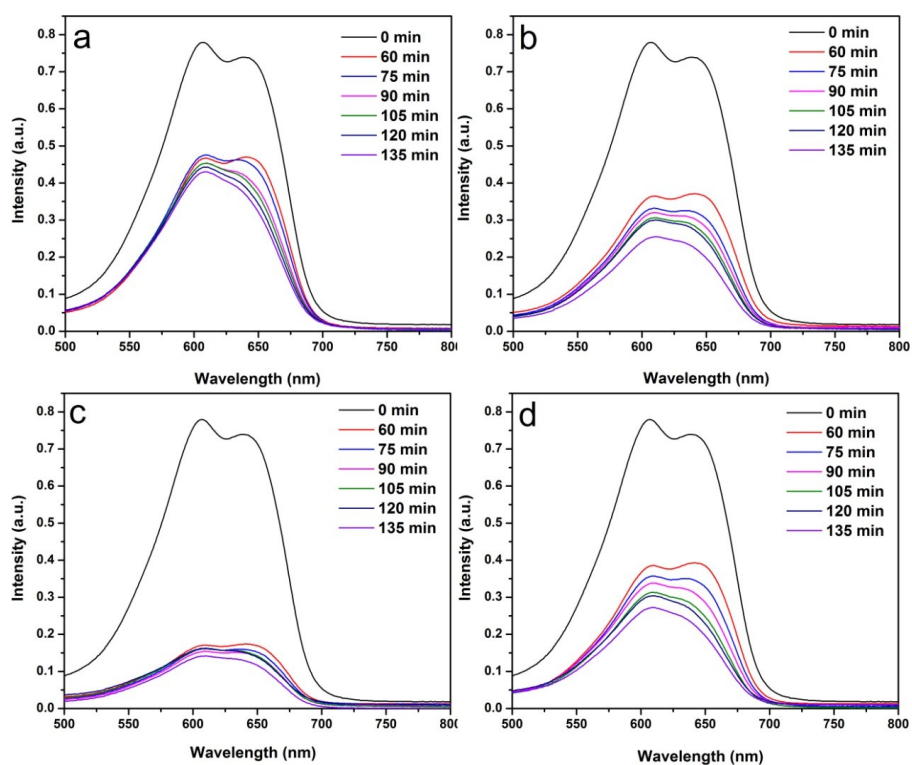

**Fig. S3** Absorption spectrum changes of Methylene Blue aqueous solution in the presence of the Ti-doped SnO<sub>2</sub> samples under UV light irradiation (a) SnO<sub>2</sub>, (b) (c) (d) 10%, 20%, 50%Ti-doped SnO<sub>2</sub>.

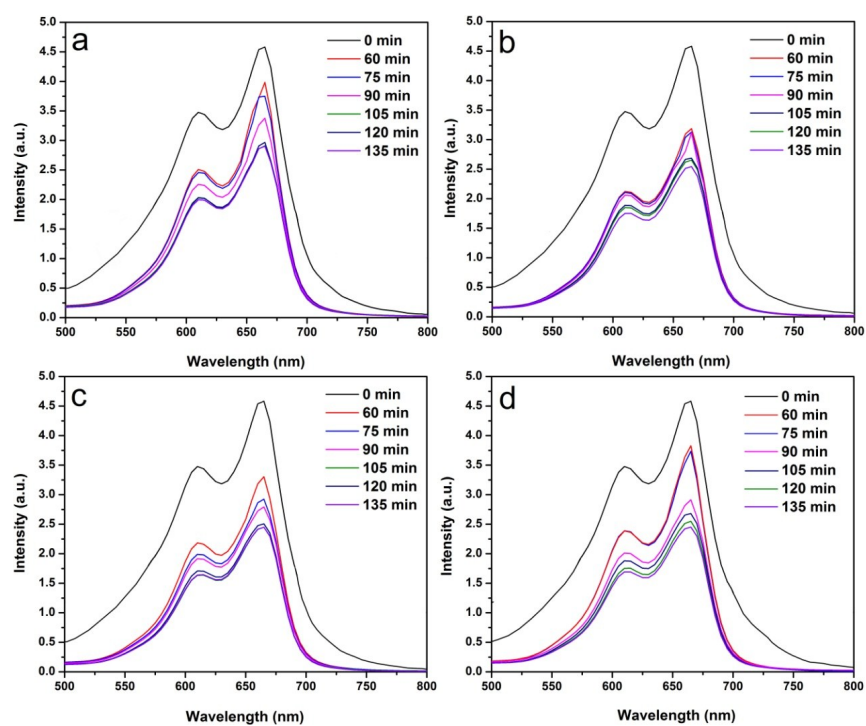

**Fig. S4** Absorption changes of Methylene Blue aqueous solution in the presence of the Ti-doped SnO<sub>2</sub> samples under visible light irradiation. (a) SnO<sub>2</sub>, (b) (c) (d) 10%, 20%, 50%Ti-doped SnO<sub>2</sub>.
